# Supplementary material
Source: publisher figshare collection journal article supplement (https://gsajournals.figshare.com/ndownloader/files/12349454)
Supplement: Supplementary file 1 [file 12349454]

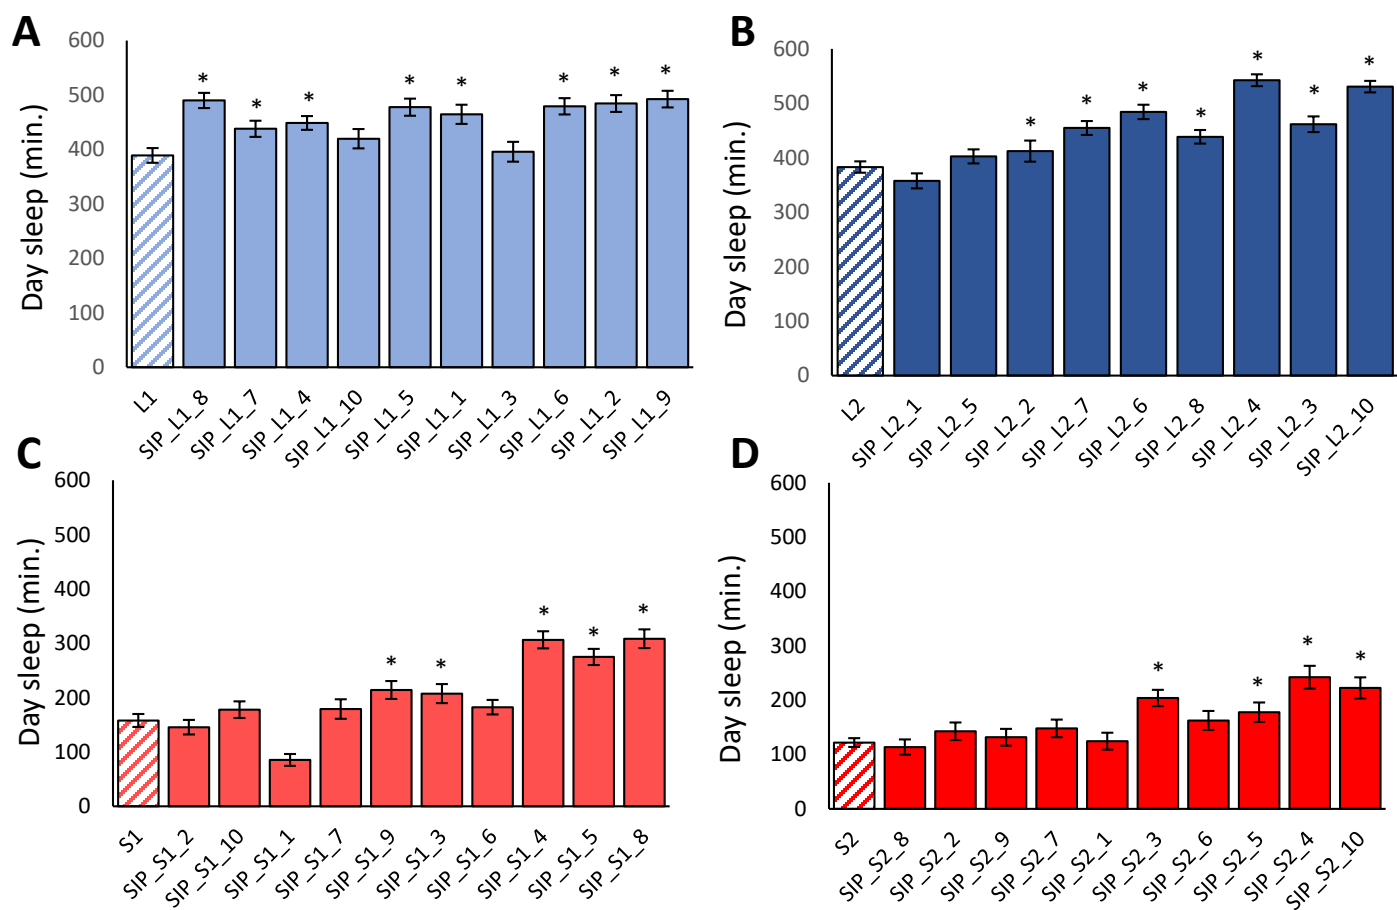

**Figure S3. Day sleep in The Sleep Inbred Panel.** Mean night sleep  $\pm$  SE is plotted for each line of the SIP as compared to the mean of its corresponding progenitor population. SIP lines are ordered from the shortest-sleeping line to the longest. Solid colors indicate SIP line; diagonal bars indicate the mean of the progenitor population as reported in Harbison *et al.*, (*PLoS Genetics*, 2017). (A-D) Night sleep in SIP lines derived from the (A) L1 population; (B) L2 population; (C) S1 population; and (D) S2 population.
